# Supplementary material for: Improved oxygen reduction reaction activities with amino acid R group functionalized PEG at platinum surfaces
Source: Royal Society of Chemistry journal article supplement (doi:10.1039/c3ta12133j), 2013-01-01
Supplement: c3ta12133j.pdf [file c3ta12133j.pdf]

**PEG-S** –  $^1\text{H}$  NMR (400 MHz,  $\text{CDCl}_3$ )  $\delta$ : 3.63 (s, 182H), 3.54 (m, 2H), 3.49 (t,  $J = 5.8$  Hz, 2H), 3.36 (s, 3H), 2.26 (t,  $J = 7.2$  Hz, 2H), 1.74 (p,  $J = 6.9$  Hz, 2H), 1.60 (m, 2H)

**PEG-T** –  $^1\text{H}$  NMR (400 MHz,  $\text{CDCl}_3$ )  $\delta$ : 3.90 – 3.84 (m, 1H), 3.67 – 3.58 (s, 182H), 3.53 (t,  $J = 3.7$  Hz, 2H), 3.41 (dd,  $J = 6.6, 2.8$  Hz, 1H), 3.36 (s, 3H), 3.00 (ddd,  $J = 13.6, 8.1, 5.2$  Hz, 1H), 2.26 (t,  $J = 7.2$  Hz, 2H), 1.72 (ddt,  $J = 10.3, 7.0, 3.8$  Hz, 2H), 1.61 (q,  $J = 6.1$  Hz, 2H), 1.14 (d,  $J = 6.3$  Hz, 3H)

**PEG-D** –  $^1\text{H}$  NMR (400 MHz,  $\text{CDCl}_3$ )  $\delta$ : 3.63 (s, 182H), 3.53 (m, 2H), 3.44 (d,  $J = 5.5$  Hz, 2H), 3.36 (s, 3H), 2.43 (t,  $J = 5.9$  Hz, 2H), 2.19 (t,  $J = 7.0$  Hz, 2H), 1.66 (m, 2H), 1.57 (m, 2H)

**PEG-E** –  $^1\text{H}$  NMR (400 MHz,  $\text{CDCl}_3$ )  $\delta$ : 3.63 (s, 182H), 3.53 (m, 2H), 3.36 (s, 3H), 3.27 (q, 2H), 2.34 (t,  $J = 6.8$  Hz, 2H), 2.21 (t,  $J = 7.2$  Hz, 2H), 1.81 (m, 2H), 1.69 (m, 2H), 1.59 (m, 2H)

**PEG-R** –  $^1\text{H}$  NMR (400 MHz,  $\text{CDCl}_3$ )  $\delta$ : 3.63 (s, 182H), 3.53 (m, 4H), 3.47 (m, 2H), 3.36 (s, 3H), 2.33 (t,  $J = 7.2$  Hz, 2H), 1.65 (m, 6H), 1.57 (s, 2H)

**PEG-K** –  $^1\text{H}$  NMR (400 MHz,  $\text{CDCl}_3$ )  $\delta$ : 3.64 (s, 182H), 3.55 (m, 2H), 3.38 (s, 3H), 3.25 (q,  $J = 5.9$  Hz, 2H), 2.95 (m, 2H), 2.88 (s, 2H), 2.25 (t,  $J = 6.8$  Hz, 2H), 1.66 (m, 2H), 1.54 (m, 2H), 1.47 (m, 2H)

**PEG-F** –  $^1\text{H}$  NMR (400 MHz,  $\text{CDCl}_3$ )  $\delta$ : 7.29 (m, 2H), 7.21 (t,  $J = 6.5$  Hz, 3H), 3.64 (s, 182H), 3.55 (m, 2H), 3.47 (t,  $J = 7.0$  Hz, 2H), 3.38 (s, 3H), 2.80 (t,  $J = 7.1$  Hz, 2H), 2.18 (t,  $J = 7.3$  Hz, 2H), 1.67 (m, 2H), 1.58 (m, 2H)

**PEG-Y** –  $^1\text{H}$  NMR (400 MHz,  $\text{CDCl}_3$ )  $\delta$ : 6.98 (d,  $J = 8.5$  Hz, 2H), 6.75 (d,  $J = 8.5$  Hz, 2H), 3.60 (s, 182H), 3.52 (m, 2H), 3.41 (m, 2H), 3.35 (s, 3H), 2.69 (t,  $J = 6.9$  Hz, 2H), 2.13 (m, 2H), 1.63 (p,  $J = 7.0$  Hz, 2H), 1.51 (p,  $J = 7.2, 6.6$  Hz, 2H).

**PEG-W** –  $^1\text{H}$  NMR (400 MHz,  $\text{CDCl}_3$ )  $\delta$ : 7.60 (d,  $J = 7.8$  Hz, 1H), 7.37 (d,  $J = 8.1$  Hz, 1H), 7.18 (t,  $J = 7.6$  Hz, 1H), 7.10 (t,  $J = 6.9$  Hz, 1H), 7.02 (s, 1H), 3.63 (s, 182H), 3.55 (m, 2H), 3.40 (t,  $J = 6.3$  Hz, 2H), 3.38 (s, 3H), 2.97 (t,  $J = 6.6$  Hz, 2H), 2.13 (t,  $J = 7.2$  Hz, 2H), 1.64 (m, 2H), 1.55 (m, 2H).

**PEG-V** –  $^1\text{H}$  NMR (400 MHz,  $\text{CDCl}_3$ )  $\delta$ : 3.61 (s, 182H), 3.46 (t,  $J = 6.1$  Hz, 2H), 3.35 (s, 3H), 3.03 (m, 2H), 2.19 (t,  $J = 7.3$  Hz, 2H), 1.72 (m, 3H), 1.58 (m, 2H), 0.88 (d,  $J = 6.7$  Hz, 6H)

**PEG-H** –  $^1\text{H}$  NMR (400 MHz,  $\text{CDCl}_3$ )  $\delta$ : 7.53 (s, 1H), 6.78 (s, 1H), 3.61 (s, 182H), 3.49 (d,  $J = 6.0$  Hz, 2H), 3.41 (m, 2H), 3.35 (s, 3H), 2.77 (t,  $J = 6.4$  Hz, 2H), 2.17 (t,  $J = 7.3$  Hz, 2H), 1.65 (m, 2H), 1.49 (m, 2H)



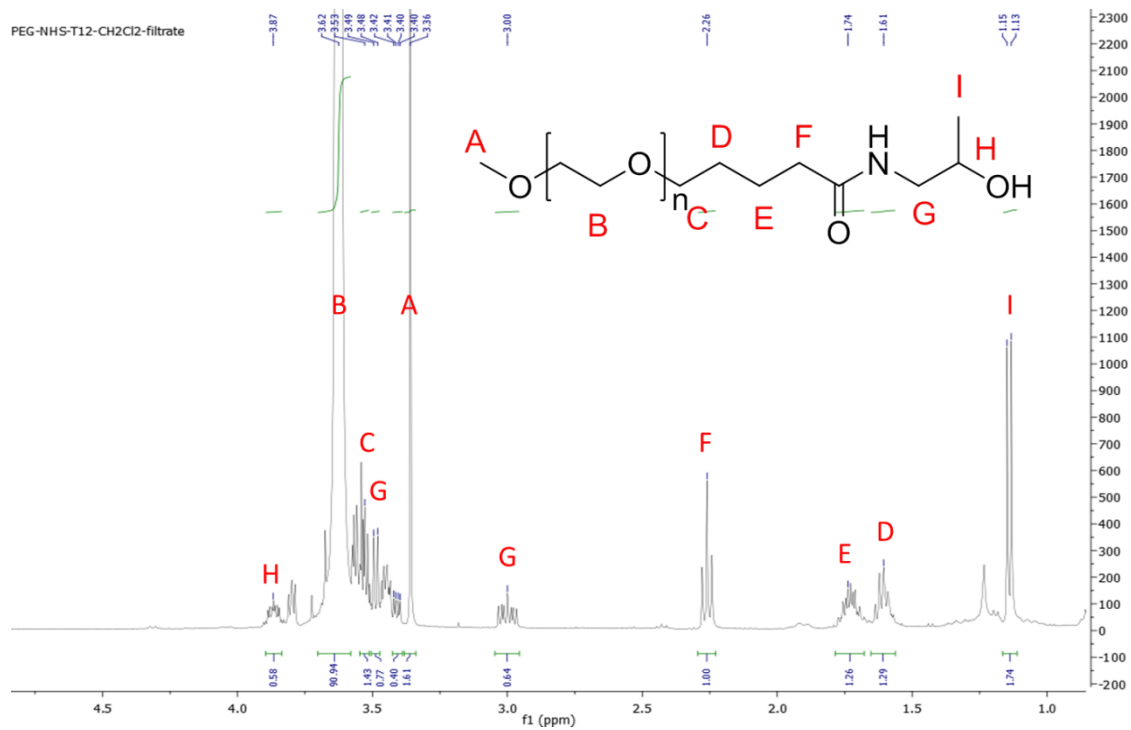

### <sup>1</sup>H NMR of synthesized PEG-T

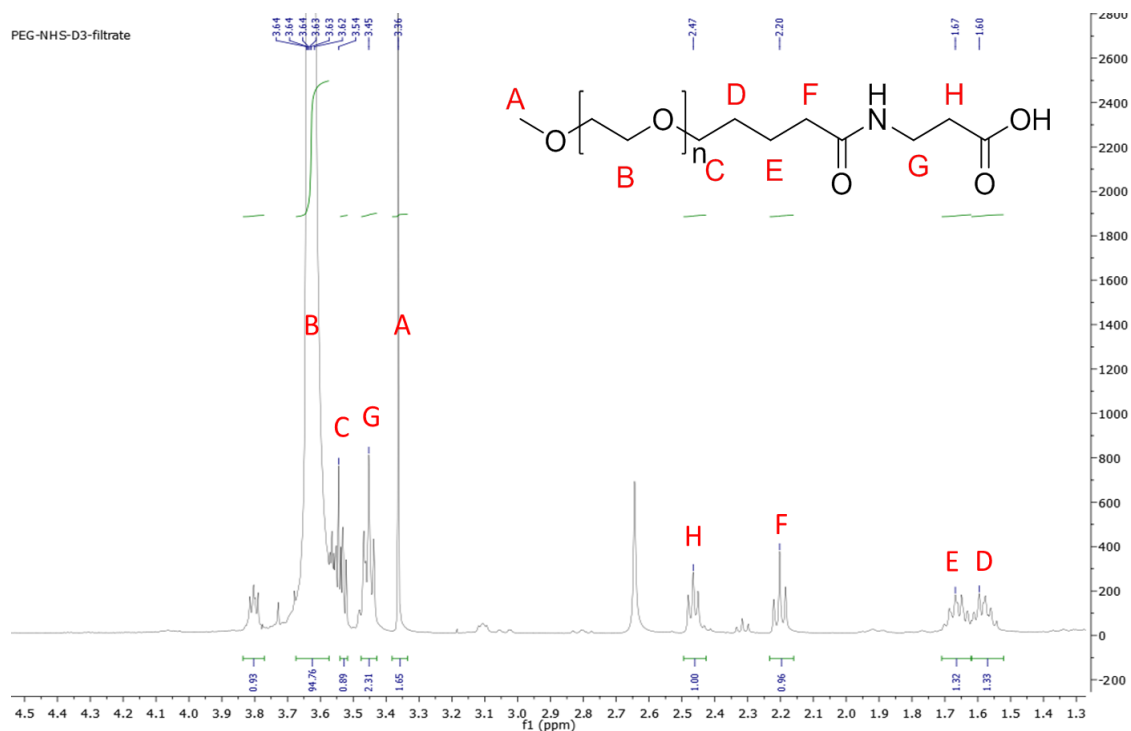

### <sup>1</sup>H NMR of synthesized PEG-D

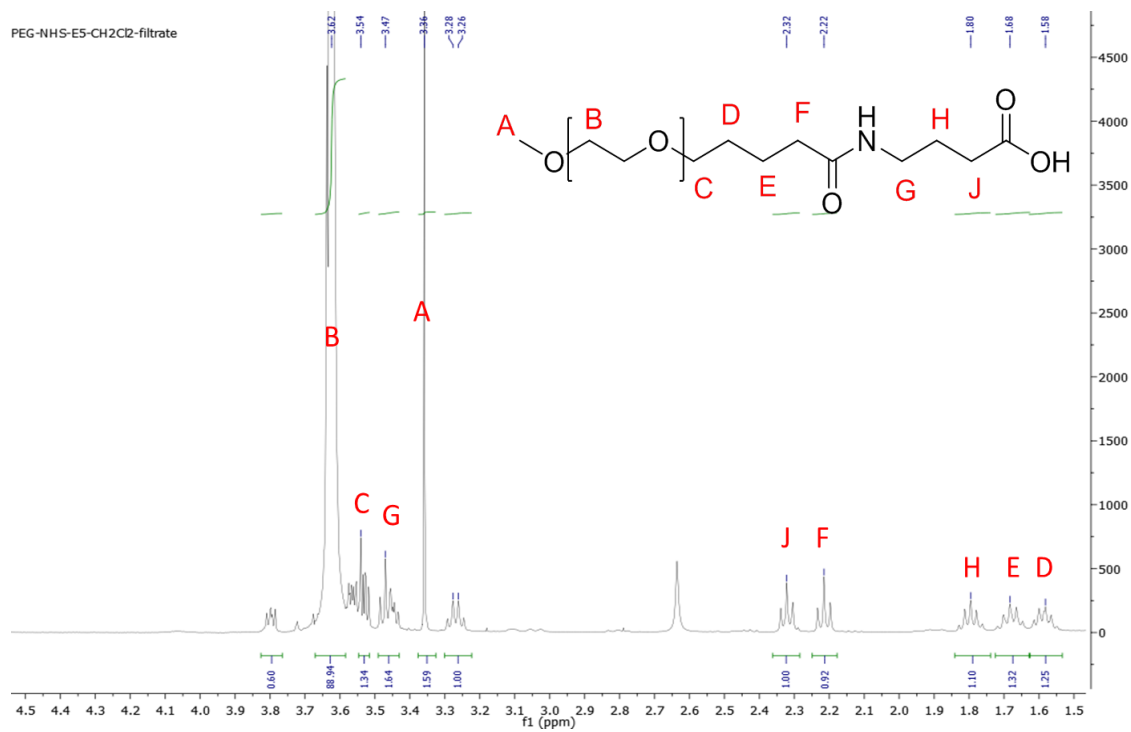

### <sup>1</sup>H NMR of synthesized PEG-E

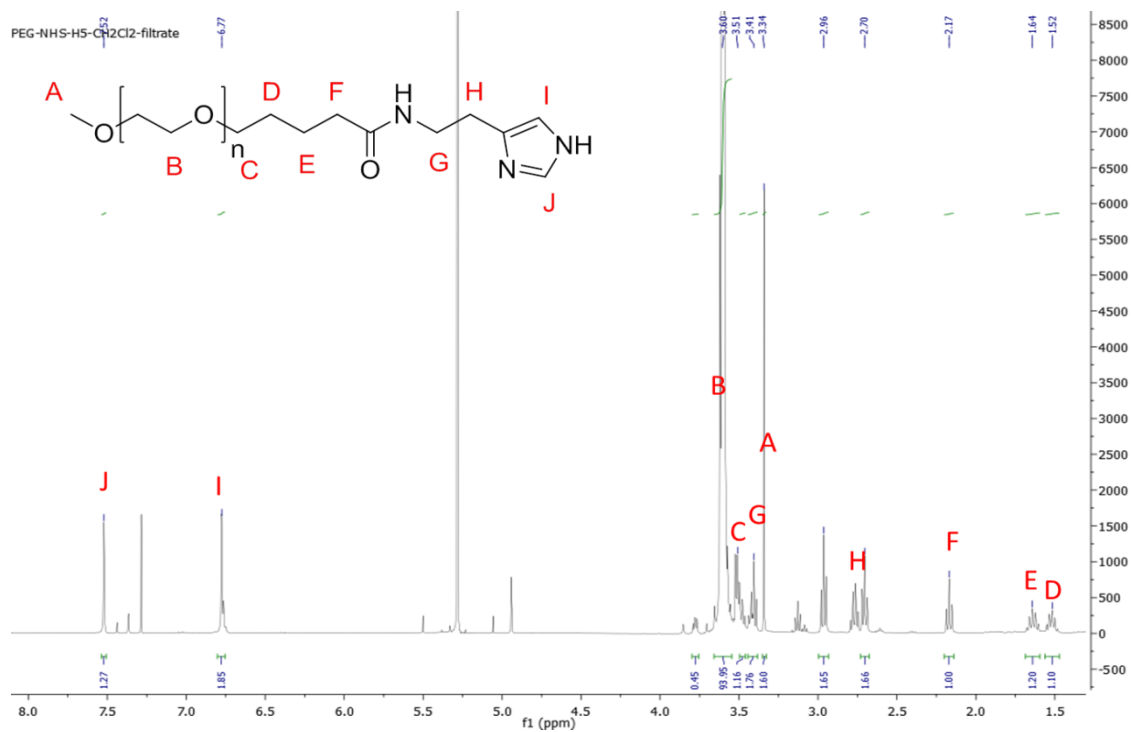

### <sup>1</sup>H NMR of synthesized Peg-H

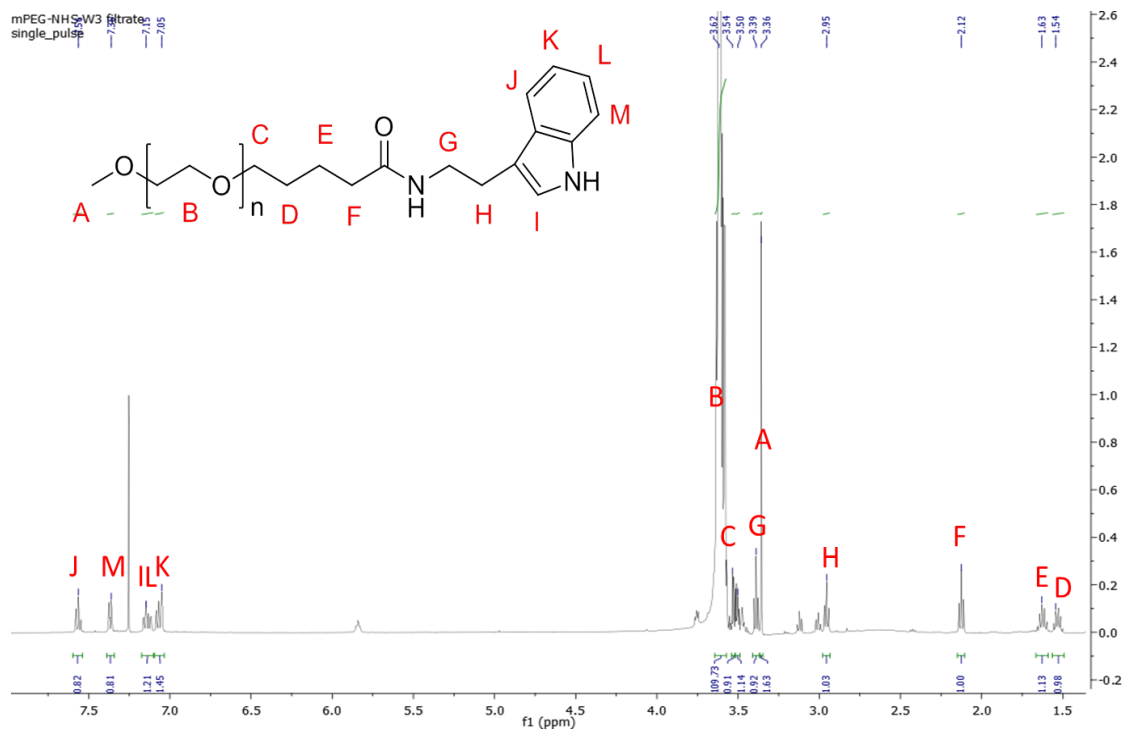

### <sup>1</sup>H NMR of synthesized PEG-W

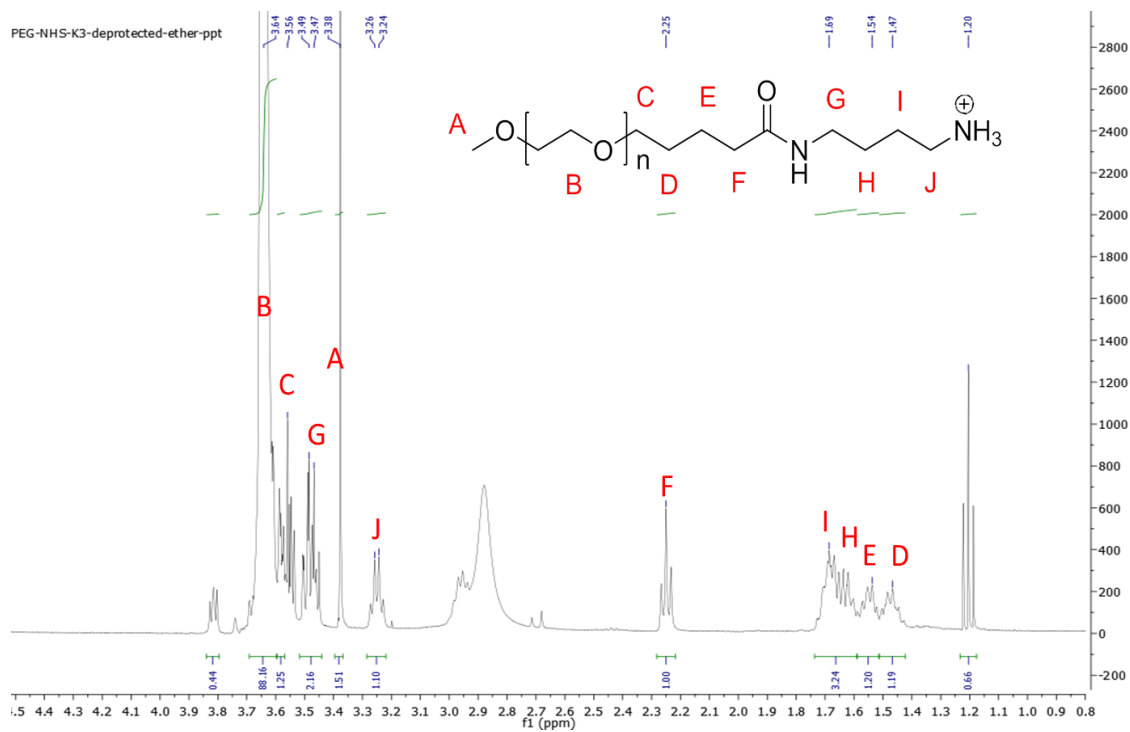

### <sup>1</sup>H NMR of synthesized PEG-K

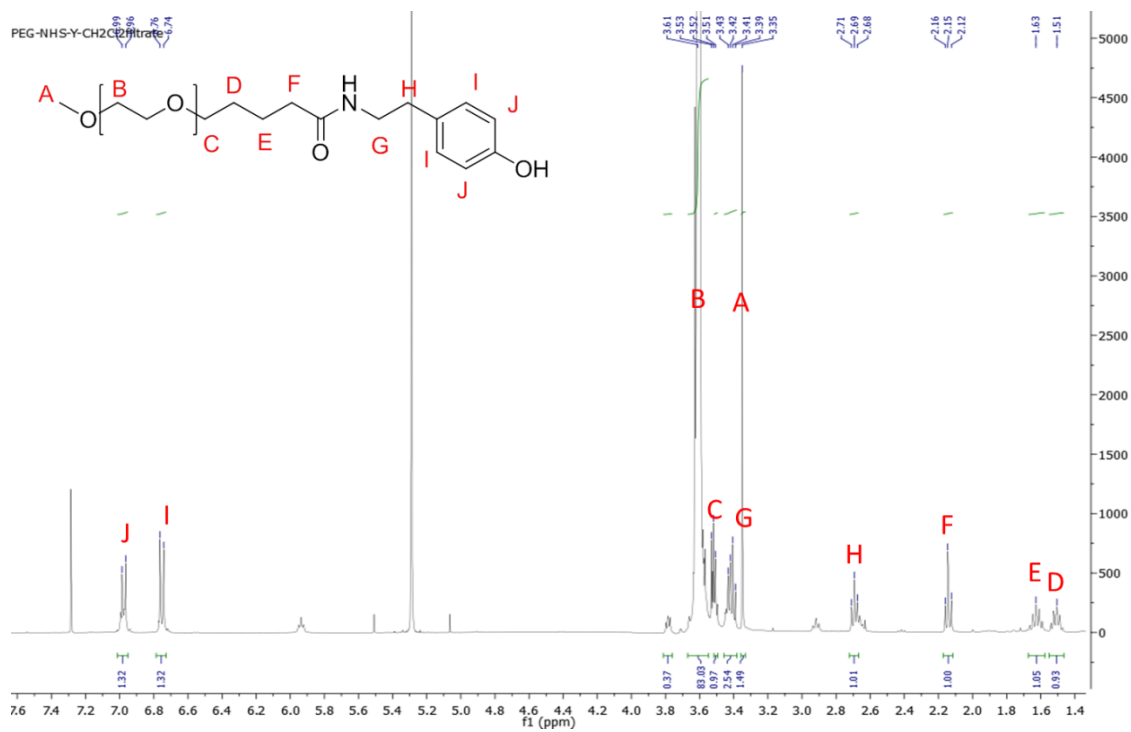

<sup>1</sup>H NMR of synthesized PEG-Y

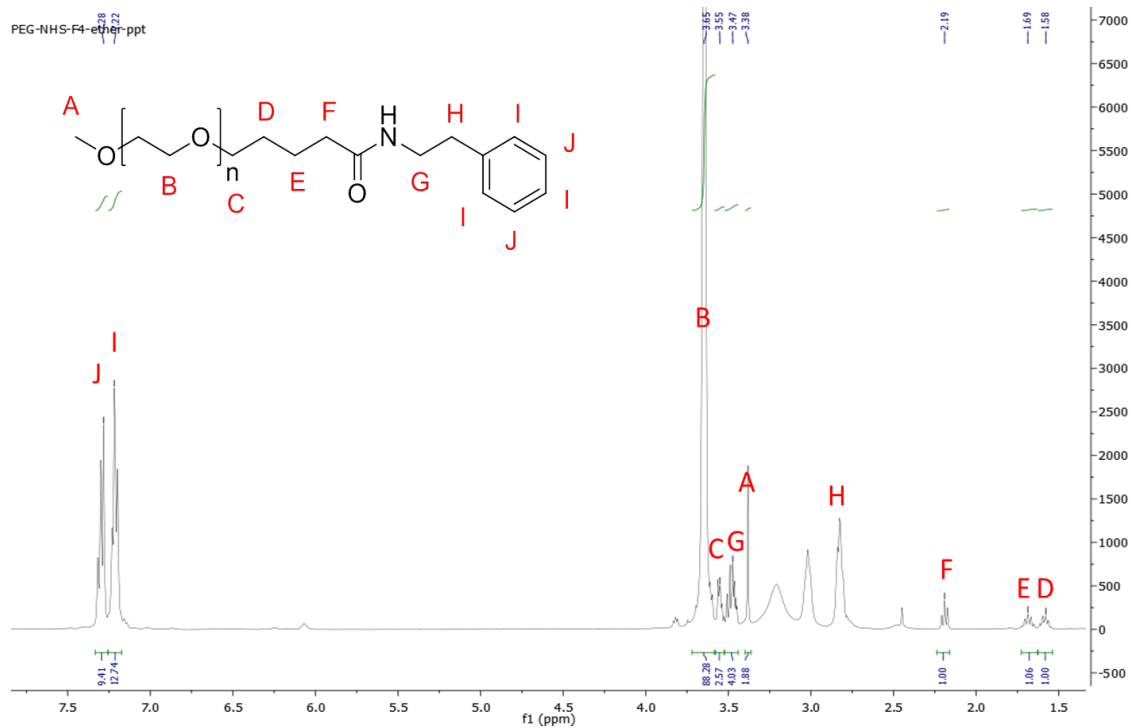

<sup>1</sup>H NMR of synthesized PEG-F

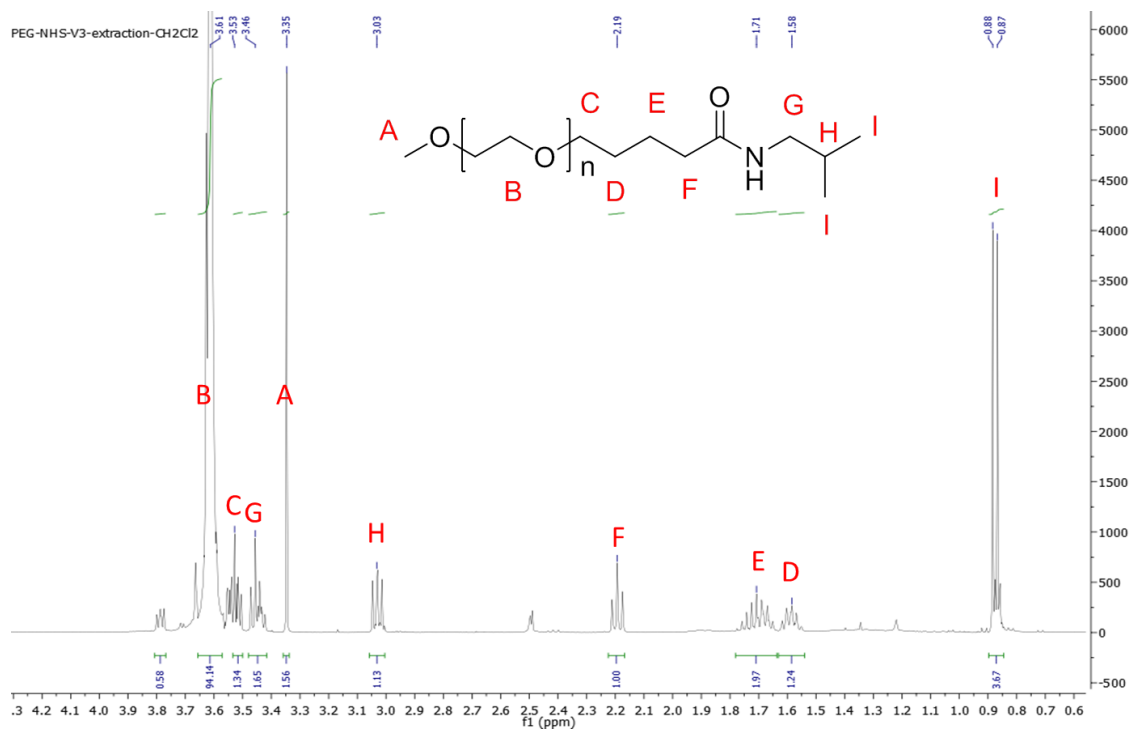

<sup>1</sup>H NMR of synthesized PEG-V

**Figure S1.** <sup>1</sup>H NMRs of Synthesized PEG-X Polymers

| 100:1 PEG-X:Pt Black Polymer Loading |       |          |       |
|--------------------------------------|-------|----------|-------|
| POLYMER                              | RATIO | POLYMER  | RATIO |
| BASES                                |       | AROMATIC |       |
| PEG-R                                | 87.1  | PEG-H    | 85.7  |
| PEG-K                                | 92.8  | PEG-W    | 93.1  |
| ACIDS                                |       | PEG-F    | 90.7  |
| PEG-D                                | 90.9  | PEG-Y    | 88.9  |
| PEG-E                                | 87.3  | ALCOHOLS |       |
| HYDROPHOBIC                          |       | PEG-T    | 87.4  |
| PEG-V                                | 90.1  | PEG-S    | 88.3  |
| m <sub>2</sub> PEG                   | 84.6  | PEG-OH   | 87.2  |

| <b>500:1 PEG-X:Pt Black Polymer Loading</b> |       |          |       |
|---------------------------------------------|-------|----------|-------|
| POLYMER                                     | RATIO | POLYMER  | RATIO |
| BASES                                       |       | AROMATIC |       |
| PEG-R                                       | 453   | PEG-H    | 462   |
| PEG-K                                       | 466   | PEG-W    | 468   |
| ACIDS                                       |       | PEG-F    | 448   |
| PEG-D                                       | 450   | PEG-Y    | 423   |
| PEG-E                                       | 439   | ALCOHOLS |       |
| HYDROPHOBIC                                 |       | PEG-T    | 444   |
| PEG-V                                       | 426   | PEG-S    | 446   |
| m <sub>2</sub> PEG                          | 442   | PEG-OH   | 442   |

**Figure S2.** Polymer Loading for the PEG-X polymers on Pt Black.

| <b>100:1 PEG-X:Pt Black ORR Measurements</b> |                       |                      |          |                       |                      |
|----------------------------------------------|-----------------------|----------------------|----------|-----------------------|----------------------|
| POLYMER                                      | MASS ACTIVITY (mA/mg) | E <sub>1/2</sub> (V) | POLYMER  | MASS ACTIVITY (mA/mg) | E <sub>1/2</sub> (V) |
| Pt black                                     | 37.0                  | 0.539                |          |                       |                      |
| BASES                                        |                       |                      | AROMATIC |                       |                      |
| PEG-R                                        | 32.8                  | 0.556                | PEG-H    | 39.3                  | 0.542                |
| PEG-K                                        | 38.7                  | 0.603                | PEG-W    | 28.2                  | 0.524                |
| ACIDS                                        |                       |                      | PEG-F    | 30.4                  | 0.495                |
| PEG-D                                        | 46.7                  | 0.551                | PEG-Y    | 35.5                  | 0.5                  |
| PEG-E                                        | 33.6                  | 0.533                | ALCOHOLS |                       |                      |
| HYDROPHOBIC                                  |                       |                      | PEG-T    | 50.7                  | 0.576                |
| PEG-V                                        | 26.7                  | 0.488                | PEG-S    | 63.0                  | 0.56                 |
| m <sub>2</sub> PEG                           | 37.6                  | 0.519                | PEG-OH   | 21.2                  | 0.573                |



| <b>500:1 PEG-X:Pt Black ORR Measurements</b> |                       |               |          |                       |               |
|----------------------------------------------|-----------------------|---------------|----------|-----------------------|---------------|
| POLYMER                                      | MASS ACTIVITY (mA/mg) | $E_{1/2}$ (V) | POLYMER  | MASS ACTIVITY (mA/mg) | $E_{1/2}$ (V) |
| Pt black                                     | 37.0                  | 0.539         |          |                       |               |
| BASES                                        |                       |               | AROMATIC |                       |               |
| PEG-R                                        | 29.8                  | 0.522         | PEG-H    | 24.7                  | 0.593         |
| PEG-K                                        | 41.3                  | 0.602         | PEG-W    | 18.8                  | 0.600         |
| ACIDS                                        |                       |               | PEG-F    | 22.1                  | 0.585         |
| PEG-D                                        | 42.2                  | 0.590         | PEG-Y    | 43.6                  | 0.555         |
| PEG-E                                        | 34.0                  | 0.559         | ALCOHOLS |                       |               |
| HYDROPHOBIC                                  |                       |               | PEG-T    | 68.0                  | 0.601         |
| PEG-V                                        | 19.6                  | 0.531         | PEG-S    | 40.8                  | 0.583         |
| m <sub>2</sub> PEG                           | 36.5                  | 0.545         | PEG-OH   | 25.4                  | 0.579         |

| <b>1000:1 PEG-T:Pt Black Polymer Loading and ORR Measurements</b> |                       |               |                 |
|-------------------------------------------------------------------|-----------------------|---------------|-----------------|
| Sample                                                            | Mass Activity (mA/mg) | $E_{1/2}$ (V) | Polymer Loading |
| PEG-T                                                             | 27.8                  | 0.558         | 733             |

**Figure S3.** ORR data for the PEG-X:Pt Black samples at 100:1, 500:1 and 1000:1.
